# Supplementary material for: Ferroelectric field manipulated nonvolatile resistance switching in Al:ZnO/Pb(Mg1/3Nb2/3)0.7Ti0.3O3 heterostructures at room temperature
Source: Royal Society of Chemistry journal article supplement (doi:10.1039/c9cp01809c), 2019-01-01
Supplement: c9cp01809c1.pdf [file c9cp01809c1.pdf]

1 **Supplementary Information**

2

3 **Ferroelectric Field Manipulated Nonvolatile Resistance**

4 **Switching in Al:ZnO/Pb(Mg<sub>1/3</sub>Nb<sub>2/3</sub>)<sub>0.7</sub>Ti<sub>0.3</sub>O<sub>3</sub> Heterostructures at**

5 **Room Temperature**

6

7 Shasha Liu, Chao Jin,\* Dongxing Zheng, Xin Pang, Yuchen Wang, Ping Wang,

8 Wanchao Zheng, and Haili Bai\*

9

10 *Tianjin Key Laboratory of Low Dimensional Materials Physics and Processing*

11 *Technology, School of Science, Tianjin University, Tianjin 300350, P.R. China*

12

---

\* Author to whom all correspondence should be addressed.

E-mail: [chaojin@tju.edu.cn](mailto:chaojin@tju.edu.cn)

E-mail: [baihaili@tju.edu.cn](mailto:baihaili@tju.edu.cn)

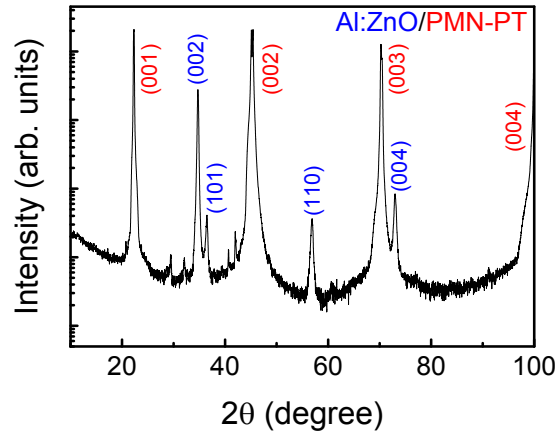

1

2 **Fig. S1** XRD  $\theta$ - $2\theta$  scan of the Al:ZnO (125 nm)/PMN-PT (001) heterostructures.

3

4 The XRD  $\theta$ - $2\theta$  scan of Al:ZnO (125 nm)/PMN-PT heterostructures is shown in  
 5 Fig. S1. The (001), (002), (003) and (004) diffraction peaks of the PMN-PT substrate  
 6 can be observed. Except the (002) and (004) diffraction peaks of Al:ZnO films, (101)  
 7 and (110) peaks are also visible, indicating the polycrystalline properties of the films.

8 Based on the Bragg equation, the out-of-plane lattice parameter of Al:ZnO film is  
 9  $\sim 5.201$  Å. Compared to the ZnO film (5.206 Å),<sup>1</sup> decreases of the lattice parameter of

10 the Al:ZnO film are observed, which can be understand by the smaller ionic radii Al<sup>3+</sup>  
 11 (0.535 Å) compare to Zn<sup>2+</sup> (0.740 Å).<sup>2</sup> According to Debye Scherrer's formula

12  $D_{hkl} = 0.9\lambda / \beta_{hkl} \cos \theta$ , the average crystalline size ( $D_{hkl}$ ) of the Al:ZnO films was  
 13 calculated, where  $\lambda$  is the wavelength of X-ray (1.5406 Å),  $\beta_{hkl}$  the full width at half  
 14 maximum of the (002) peak in radians and  $\theta$  is the Bragg's diffraction angle.<sup>3-7</sup> The

15  $D_{002}$  of the Al:ZnO thin film is  $\sim 35$  nm. The micro strain ( $\varepsilon$ ) of the Al:ZnO thin film  
 16 was determined to be  $\sim 0.98 \times 10^{-3}$  based on the equation  $\varepsilon = \beta_{hkl} \cos \theta / 4$ .<sup>3-5,8</sup>

17

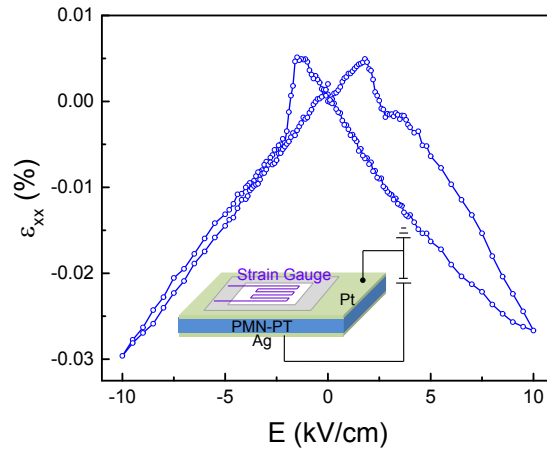

1

2 **Fig. S2** Strain vs. electric field of PMN-PT substrate. The inset shows the  
 3 measurement structure diagram. The electric field was applied from zero to positive,  
 4 then to negative and finally back to zero during the measurement of  $S-E$  curve.

5

6 The in-plane strain vs. electric field of the PMN-PT substrate was measured by  
 7 using a strain gauge that attached to the PMN-PT surface with glue. A typical  
 8 butterfly curve is obtained. The strain returns to zero after the electric field removed,  
 9 which is almost volatile.

10

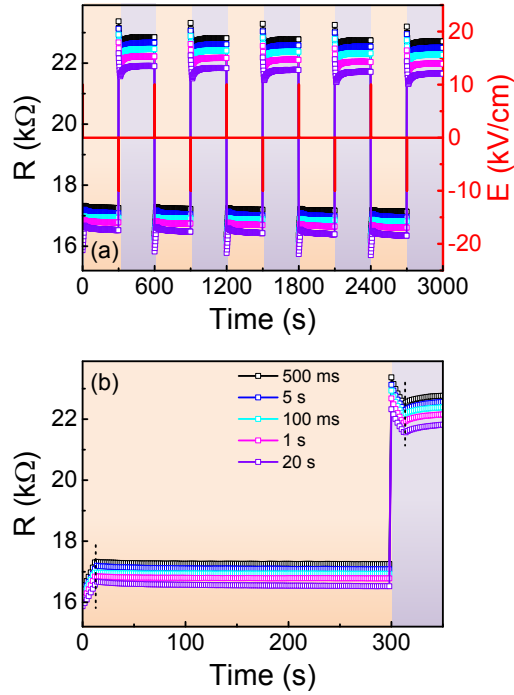

1

2 **Fig. S3** (a) Resistance vs. time with different pulse width measured at room  
 3 temperature after poling by +10 kV/cm and -10 kV/cm. The electric field was applied  
 4 along out-of-plane (001) directions. (b) Enlarged view in 0–350 s.

5

6 Except the pulse width of 20 s, the resistance switching properties of 100 ms,  
 7 500 ms, 1 s and 5 s were also measured. In the all impulse width, the resistance vs.  
 8 time is similar, as shown in Fig. S3. The resistance switching properties of the all  
 9 impulse width are same.

10

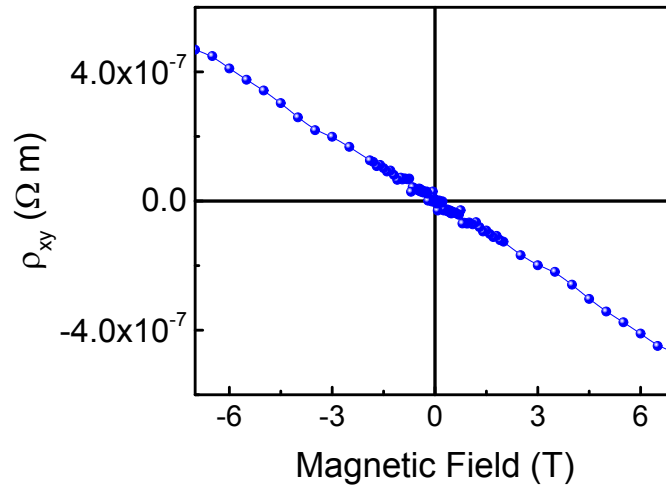

1

2 **Fig. S4** Hall resistivity  $\rho_{xy}$  vs. magnetic field  $H$  of the Al:ZnO (125 nm)/PMN-PT  
 3 heterostructure at 300 K.

4

5 To obtain the carrier density of the Al:ZnO film, the Hall effect of the Al:ZnO  
 6 (125 nm)/PMN-PT heterostructure was measured at 300 K. As shown in Fig. S4, the  
 7 slope of the Hall resistivity  $\rho_{xy}$  vs. magnetic field  $H$  is negative, indicating the  $n$ -type  
 8 nature of the Al:ZnO film. The slope of  $\rho_{xy}-H$  is obtained by linear fitting, i.e., the  
 9 Hall coefficient  $R_H$ . The carrier density of  $\sim 9.3 \times 10^{19} \text{ cm}^{-3}$  can be obtained by  
 10  $R_H = -1/ne$ , where  $n$  and  $e$  are the volume carrier density of the Al:ZnO film and the  
 11 elementary charge, respectively.

12

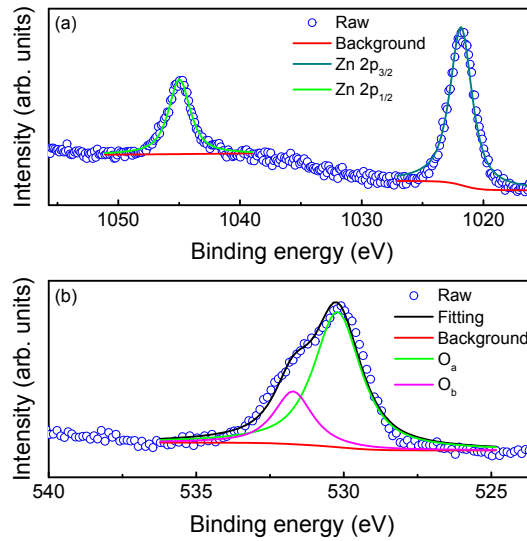

1

2 **Fig. S5** XPS spectra of the Al:ZnO film in the region of (a) Zn 2p<sub>1/3</sub>, 2p<sub>2/3</sub> and (b) O  
 3 1s peaks.

4

5 To confirm the presence oxygen vacancies in the Al:ZnO films, the XPS was  
 6 measured. The XPS spectra of the Zn 2p<sub>1/3</sub>, 2p<sub>2/3</sub> and O 1s are given in Fig. S5. The  
 7 peaks of Zn 2p are located at 1021.9 eV (Zn 2p<sub>1/3</sub>) and 1044.9 eV (Zn 2p<sub>2/3</sub>),  
 8 respectively.<sup>9</sup> The O 1s XPS spectrum can be fitted into two components. One peak is  
 9 around 530.2 eV (O<sub>a</sub>), which can be attributed to the O<sup>2-</sup> ions in Al:ZnO. The other  
 10 peak is around 531.6 eV (O<sub>b</sub>), it is related to the O<sup>2-</sup> ions in the oxygen deficient  
 11 regions of the Al:ZnO.<sup>10</sup>

12

## 1 References

- 1 R. R. Reeber, *J. Appl. Phys.*, 1970, **41**, 5063–5066.
- 2 M. Saleem, S. A. Siddiqi, S. Atiq, M. S. Anwar, I. Hussain and S. Alam, *Mater. Charact.*, 2011, **62**, 1102–1107.
- 3 A. Goktas, *J. Alloys Compd.*, 2018, **735**, 2038–2045.
- 4 A. Goktas, A. Tumbul and F. Aslan, *J. Sol–Gel. Sci. Technol.*, 2016, **78**, 262–269.
- 5 J. Lee, D. Lee, D. Lim and K. Yang, *Thin Solid Films*, 2007, **515**, 6094–6098.
- 6 A. L. Patterson, *Phys. Rev.*, 1939, **56**, 978–982.
- 7 F. Boulch, M. C. Schouler, P. Donnadieu, J. M. Chaix and E. Djurado, *Image Anal. Stereol.*, 2001, **20**, 157–161.
- 8 K. Rajasekar, L. Kungumadevi, A. Subbarayan and R. Sathyamoorthy, *Ionics*, 2008, **14**, 69–72.
- 9 D. Q. Gao, J. Zhang, G. J. Yang, J. L. Zhang, Z. H. Shi, J. Qi, Z. H. Zhang and D. S. Xue, *J. Phys. Chem. C*, 2010, **114**, 13477–13481.
- 10 M. Chen, X. Wang, Y. H. Yu, Z. L. Pei, X. D. Bai, C. Sun, R. F. Huang and L. S. Wen, *Appl. Surf. Sci.*, 2000, **158**, 134–140.
